# Supplementary material for: Fine Mapping of Lycopene Content and Flesh Color Related Gene and Development of Molecular Marker–Assisted Selection for Flesh Color in Watermelon (Citrullus lanatus)
Source: Front Plant Sci. 2019 Oct 8;10:1240. doi: 10.3389/fpls.2019.01240 (PMC6791925; doi:10.3389/fpls.2019.01240)
Supplement: Supplementary file 6 [file Table_1.xlsx]

## Sheet: Table S1
Table S1. Candidate genes in the mapping chromosome region
Gene No.	GO Molecular Functions
Cla005011	GO:0016705 - oxidoreductase activity, acting on paired donors, with incorporation or reduction of molecular oxygen
	GO:0034019 - capsanthin/capsorubin synthase activity
	GO:0016853 - isomerase activity
	GO:0045435 - lycopene epsilon cyclase activity
	GO:0016491 - oxidoreductase activity
Cla005012	GO:0005524 - ATP binding
	GO:0003774 - motor activity
	GO:0008569 - minus-end-directed microtubule motor activity
	GO:0008017 - microtubule binding
	GO:0005515 - protein binding
	GO:0000166 - nucleotide binding
	GO:0003777 - microtubule motor activity
	GO:0016887 - ATPase activity
Cla005013	None
Cla005014	None
Cla005015	GO:0003885 - D-arabinono-1,4-lactone oxidase activity
	GO:0042802 - identical protein binding
	GO:0016633 - galactonolactone dehydrogenase activity
	GO:0050660 - FAD binding
	GO:0003824 - catalytic activity
	GO:0050582 - xylitol oxidase activity
	GO:0005515 - protein binding
	GO:0050105 - L-gulonolactone oxidase activity
	GO:0016491 - oxidoreductase activity
	GO:0016899 - oxidoreductase activity, acting on the CH-OH group of donors, oxygen as acceptor

## Sheet: Table S2
Table S2. Mean lycopene content in different alleles for Pop.1 with WII04EBsaHI-6 and WII04E08-38
	WII04EBsaHI-6	WII04E08-38
Alleles in the F2 individuals	Mean lycopene content (µg·g-1)
A	37.38±13.24	37.43±13.79
B	0.23±0.06	0.21±0.09
H	2.62±8.10	3.43±10.2

## Sheet: Table S3
Table S3. Validity of the CAPS markers tightly linked to the flesh color gene tested with 81 accessions of watermelon
Materials No.	Phenotype	Marker Name
		WII04EBsaHI-6	W04EII08-38	WII04EKpnI-1	WII04E07-40
PI 164655	pink	1	0	0	0
PI 164634	pink	1	0	0	0
PI 635642	pink	1	0	0	0
ZXG01594	pink	1	0	0	0
W1-66	pink	1	0	0	0
W1-33	pink	1	0	0	1
PI 635594	red	1	0	0	0
PI 635688	red	1	0	0	0
PI 635712	red	1	0	0	0
ZXG00055	red	1	0	0	0
ZXG01549	red	1	0	0	0
ZXG00079	red	1	0	0	0
G1-1	red	1	0	0	0
G1-2	red	1	0	0	0
G1-3	red	1	0	0	0
G1-10	red	1	0	0	0
F7-6	red	1	0	0	0
F7-82	red	1	0	0	0
F7-97	red	1	0	0	0
F7-159	red	1	0	0	0
F7-260	red	1	0	0	0
F7-283	red	1	0	0	0
W1-1	red	1	0	0	0
W1-3	red	1	0	0	0
W1-5	red	1	0	0	0
W1-6	red	1	0	0	0
W1-11	red	1	0	0	0
W1-12	red	1	0	0	0
W1-13	red	1	0	0	0
W1-15	red	1	0	0	0
W1-17	red	1	0	0	0
W1-22	red	1	0	0	0
W1-23	red	1	0	0	0
W1-25	red	1	0	0	0
W1-28	red	1	0	0	0
W1-30	red	1	0	0	0
W1-32	red	1	0	0	0
W1-36	red	1	0	0	0
W1-38	red	1	0	0	0
W1-39	red	1	0	0	0
W1-40	red	1	0	0	0
W1-43	red	1	0	0	0
W1-49	red	1	0	0	0
W1-51	red	1	0	0	0
W1-56	red	1	0	0	0
W1-57	red	1	0	0	0
W1-63	red	1	0	0	0
W1-67	red	1	0	0	0
PI 248774	white	0	1	1	1
PI 532666	white	0	1	1	1
PI 254622	white	0	1	1	1
PI 525084	white	0	1	0	0
W1-48	white	0	1	0	0
PI 164248	white	0	h	0	0
PI 457916	white	0	1	0	0
PI 595203	white	0	0	1	0
ZXG0000	white	0	0	1	0
PI 186489	white	0	h	h	0
PI 186975	white	0	h	h	0
PI 481871	white	0	1	h	h
PI 482248	white	h	h	h	0
PI 171392	white	h	0	h	h
PI 500354	yellow	0	1	1	1
PI 500303	yellow	0	1	1	1
PI 482361	yellow	0	1	1	1
PI 635597	yellow	0	1	1	1
ZXG00077	yellow	0	1	1	1
W1-29	pale yellow	0	1	1	1
W1-41	pale yellow	0	1	1	1
W1-60	pale yellow	0	1	1	1
W1-61	pale yellow	0	1	1	1
W1-69	pale yellow	0	1	1	1
G1-6	yellow	0	1	1	1
G1-7	yellow	0	1	1	1
G1-9	yellow	0	1	1	1
G1-8	yellow	0	1	1	1
W1-47	yellow	0	1	1	1
W1-52	yellow	0	1	1	0
W1-55	yellow	0	1	1	1
PI 193963	light yellow	1	0	0	0
PI 601228	yellow	1	0	0	0
